# Supplementary material
Source: Royal Society of Chemistry journal article supplement (doi:10.1039/d6cp00920d)
Supplement: d6cp00920d1.pdf [file d6cp00920d1.pdf]

## SUPPORTING INFORMATION

### **SLi<sub>4</sub>X<sub>3</sub><sup>-</sup> (X = Cl, Br, I): Fan-shaped Superhalogen Anions Featuring Planar Tetracoordinate Sulfur**

Ting Zhang,<sup>1</sup> Ya-Xuan Cheng,<sup>2</sup> and Jin-Chang Guo\*<sup>2</sup>

<sup>1</sup>Department of Chemistry, Xinzhou Normal University, Xinzhou 034000, China

<sup>2</sup>Institute of Molecular Science, Shanxi University, Taiyuan 030006, China

\*E-mail: guojc@sxu.edu.cn

### Supporting Information

- Table S1.** The lowest vibrational frequency ( $\nu_{\min}$ , cm<sup>-1</sup>) at four classical theoretical levels for the global minimum **1–3** structures of SLi<sub>4</sub>X<sub>3</sub><sup>-</sup> (X = Cl, Br, I) clusters.
- Table S2.** Energy components of IQA for the C<sub>2v</sub> S©Li<sub>4</sub>X<sub>3</sub><sup>-</sup> (X = Cl, Br, I) clusters at the PBE0/TZ2P level;  $V^{IQA}$ ,  $V_C$ , and  $V_{XC}$  are the interatomic IQA interaction energy and the coulombic and exchange-correlation energy components, respectively, in kcal/mol.
- Table S3.** AIM parameters (atomic units) for the bond critical points (BCPs) corresponding to the bonds in C<sub>2v</sub> SLi<sub>4</sub>Cl<sub>3</sub><sup>-</sup> (**1**) cluster.
- Table S4.** AIM parameters (atomic units) for the bond critical points (BCPs) corresponding to the bonds in C<sub>2v</sub> SLi<sub>4</sub>Br<sub>3</sub><sup>-</sup> (**2**) cluster.
- Table S5.** AIM parameters (atomic units) for the bond critical points (BCPs) corresponding to the bonds in C<sub>2v</sub> SLi<sub>4</sub>I<sub>3</sub><sup>-</sup> (**3**) cluster.
- Figure S1.** The AdNDP bonding pattern of SLi<sub>4</sub>Br<sub>3</sub><sup>-</sup> (**2**) with occupation numbers (ONs, in |e|). (a) Nine lone pairs (LPs) of three Br atoms; (b) Three LPs of the S center; (c) Three 3c-2e Li–Br–Li  $\sigma$  bonds; (d) One 5c-2e  $\sigma$  bond.
- Figure S2.** The AdNDP bonding pattern of SLi<sub>4</sub>I<sub>3</sub><sup>-</sup> (**3**) with occupation numbers (ONs, in |e|). (a) Nine lone pairs (LPs) of three I atoms; (b) Three LPs of the S center; (c) Three

3c-2e Li-I-Li  $\sigma$  bonds; (d) One 5c-2e  $\sigma$  bond.

**Figure S3.** 2D plots of ELF and the contour line maps of Laplacian of electron density, bond paths and critical points of ptS **2** and **3**. The blue and red solid lines represent the positive and negative regions, respectively. The brown sticks between the atoms represent bond paths. The brown and yellow dots are bond and ring critical points, respectively.

**Figure S4.** Color-filled maps of NICS(0)<sub>ZZ</sub> and NICS(1)<sub>ZZ</sub> of the ptS **2, 3** clusters. 0 and 1 (in Å) represent the height above the molecular plane. Negative values indicate aromaticity.

Cartesian coordinates of the top five low-lying isomers of  $\text{SLi}_4\text{X}_3^-$  ( $\text{X} = \text{Cl}, \text{Br}, \text{I}$ ) at the PBE0-D3(BJ)/def2-TZVPP level.

**Table S1.** The lowest vibrational frequency ( $\nu_{\min}$ ,  $\text{cm}^{-1}$ ) at four classical theoretical levels for the global-minimum **1–3** structures of  $\text{SLi}_4\text{X}_3^-$  ( $\text{X} = \text{Cl}, \text{Br}, \text{I}$ ) clusters.

|   | Theoretical level        | $\nu_{\min}$ ( $\text{cm}^{-1}$ ) |          |          |
|---|--------------------------|-----------------------------------|----------|----------|
|   |                          | <b>1</b>                          | <b>2</b> | <b>3</b> |
| 1 | PBE0-D3(BJ)/def2-TZVPP   | 10.6                              | 9.3      | 5.6      |
| 2 | B2PLYP-D3(BJ)/def2-TZVPP | 12.1                              | 7.5      | 4.6      |
| 3 | MP2/def2-TZVPP           | 19.1                              | 15.7     | 14.4     |
| 4 | CCSD/def2-TZVPP          | 19.3                              | 15.7     | 14.2     |

**Table S2.** Energy components of IQA for the  $C_{2v}$   $SLi_4X_3^-$  ( $X = Cl, Br, I$ ) clusters at the PBE0/TZ2P level;  $V^{IQA}$ ,  $V_C$ , and  $V_{XC}$  are the interatomic IQA interaction energy and the coulombic and exchange-correlation energy components, respectively, in kcal/mol.

|                    | 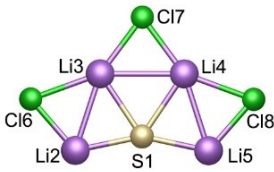<br>1 $SLi_4Cl_3^-$ ( $C_{2v}$ , $^1A_1$ ) | <br>2 $SLi_4Br_3^-$ ( $C_{2v}$ , $^1A_1$ ) | <br>3 $SLi_4I_3^-$ ( $C_{2v}$ , $^1A_1$ ) |
|--------------------|-----------------------------------------------------------------------------------------------------------------------------|------------------------------------------------------------------------------------------------------------------------------|------------------------------------------------------------------------------------------------------------------------------|
| $V^{IQA}(S1-Li2)$  | -237.6                                                                                                                      | -237.9                                                                                                                       | -237.2                                                                                                                       |
| $V_C(S1-Li2)$      | -218.2 (91.8%)                                                                                                              | -218.7 (91.9%)                                                                                                               | -218.1 (91.9%)                                                                                                               |
| $V_{XC}(S1-Li2)$   | -19.4 (8.2%)                                                                                                                | -19.2 (8.1%)                                                                                                                 | -19.1 (8.1%)                                                                                                                 |
| $V^{IQA}(S1-Li3)$  | -218.1                                                                                                                      | -222.8                                                                                                                       | -222.5                                                                                                                       |
| $V_C(S1-Li3)$      | -207.4 (95.1%)                                                                                                              | -211.0 (94.7%)                                                                                                               | -210.0 (94.4%)                                                                                                               |
| $V_{XC}(S1-Li3)$   | -10.7 (4.9%)                                                                                                                | -11.8 (5.3%)                                                                                                                 | -12.5 (5.6%)                                                                                                                 |
| $V^{IQA}(Li2-Li3)$ | 100.9                                                                                                                       | 98.3                                                                                                                         | 95.2                                                                                                                         |
| $V_C(Li2-Li3)$     | 101.0 (99.9%)                                                                                                               | 98.4 (99.9%)                                                                                                                 | 95.3 (99.9%)                                                                                                                 |
| $V_{XC}(Li2-Li3)$  | -0.1 (0.1%)                                                                                                                 | -0.1 (0.1%)                                                                                                                  | -0.1 (0.1%)                                                                                                                  |
| $V^{IQA}(Li3-Li4)$ | 96.2                                                                                                                        | 94.6                                                                                                                         | 90.8                                                                                                                         |
| $V_C(Li3-Li4)$     | 96.3 (99.9%)                                                                                                                | 94.7 (99.9%)                                                                                                                 | 90.9 (99.9%)                                                                                                                 |
| $V_{XC}(Li3-Li4)$  | -0.1 (0.1%)                                                                                                                 | -0.1 (0.1%)                                                                                                                  | -0.1 (0.1%)                                                                                                                  |
| $V^{IQA}(Li2-X6)$  | -145.0                                                                                                                      | -137.8                                                                                                                       | -128.4                                                                                                                       |
| $V_C(Li2-X6)$      | -129.6 (89.4%)                                                                                                              | -123.1 (89.3%)                                                                                                               | -115.3 (89.8%)                                                                                                               |
| $V_{XC}(Li2-X6)$   | -15.4 (10.6%)                                                                                                               | -14.7 (10.7%)                                                                                                                | -13.1 (10.2%)                                                                                                                |
| $V^{IQA}(Li3-X6)$  | -128.3                                                                                                                      | -121.3                                                                                                                       | -111.0                                                                                                                       |
| $V_C(Li3-X6)$      | -118.9 (92.7%)                                                                                                              | -113.1 (93.2%)                                                                                                               | -103.8 (93.5%)                                                                                                               |
| $V_{XC}(Li3-X6)$   | -9.4 (7.3%)                                                                                                                 | -8.2 (6.8%)                                                                                                                  | -7.2 (6.5%)                                                                                                                  |
| $V^{IQA}(Li3-X7)$  | -136.7                                                                                                                      | -127.5                                                                                                                       | -118.1                                                                                                                       |
| $V_C(Li3-X7)$      | -124.0 (90.7%)                                                                                                              | -116.6 (91.5%)                                                                                                               | -108.1 (91.5%)                                                                                                               |
| $V_{XC}(Li3-X7)$   | -12.7 (9.3%)                                                                                                                | -10.9 (8.5%)                                                                                                                 | -10.0 (8.5%)                                                                                                                 |

**Table S3.** AIM parameters (atomic units) for the bond critical points (BCPs) corresponding to the bonds in  $C_{2v}$   $SLi_4Cl_3^-$  (**1**) cluster.

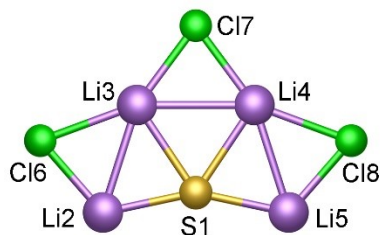

| Bonds   | $\rho(r)$ | $\nabla^2\rho(r)$ | $H(r)$ | $-G(r)/V(r)$ |
|---------|-----------|-------------------|--------|--------------|
| S1–Li2  | 0.035     | 0.177             | 0.002  | 1.063        |
| S1–Li3  | 0.022     | 0.103             | 0.003  | 1.133        |
| Li2–Cl6 | 0.031     | 0.182             | 0.005  | 1.132        |
| Li3–Cl6 | 0.020     | 0.110             | 0.004  | 1.209        |
| Li3–Cl7 | 0.026     | 0.147             | 0.005  | 1.168        |

**Table S4.** AIM parameters (atomic units) for the bond critical points (BCPs) corresponding to the bonds in  $C_{2v}$   $SLi_4Br_3^-$  (**2**) cluster.

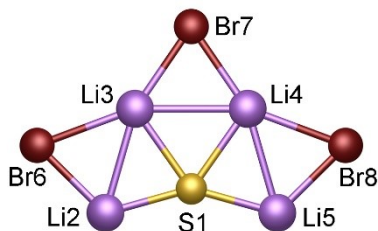

| Bonds   | $\rho(r)$ | $\nabla^2\rho(r)$ | $H(r)$ | $-G(r)/V(r)$ |
|---------|-----------|-------------------|--------|--------------|
| S1–Li2  | 0.035     | 0.176             | 0.002  | 1.064        |
| S1–Li3  | 0.023     | 0.110             | 0.003  | 1.128        |
| Li2–Br6 | 0.027     | 0.133             | 0.003  | 1.105        |
| Li3–Br6 | 0.017     | 0.079             | 0.002  | 1.170        |
| Li3–Br7 | 0.022     | 0.107             | 0.003  | 1.136        |

**Table S5.** AIM parameters (atomic units) for the bond critical points (BCPs) corresponding to the bonds in  $C_{2v}$   $SLi_4I_3^-$  (**3**) cluster.

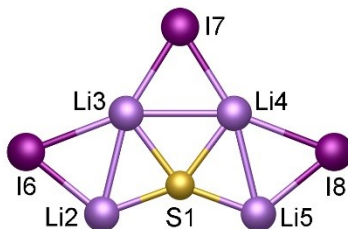

| Bonds  | $\rho(r)$ | $\nabla^2\rho(r)$ | $H(r)$ | $-G(r)/V(r)$ |
|--------|-----------|-------------------|--------|--------------|
| S1–Li2 | 0.035     | 0.175             | 0.002  | 1.064        |
| S1–Li3 | 0.024     | 0.117             | 0.003  | 1.122        |
| Li2–I6 | 0.022     | 0.092             | 0.002  | 1.079        |
| Li3–I6 | 0.013     | 0.053             | 0.001  | 1.140        |
| Li3–I7 | 0.018     | 0.073             | 0.002  | 1.111        |

**Figure S1.** The AdNDP bonding pattern of  $\text{SLi}_4\text{Br}_3^-$  (**2**) with occupation numbers (ONs, in  $|e|$ ).

(a) Nine lone pairs (LPs) of three Br atoms; (b) Three LPs of the S center; (c) Three 3c-2e Li-Br-Li  $\sigma$  bonds; (d) One 5c-2e  $\sigma$  bond.

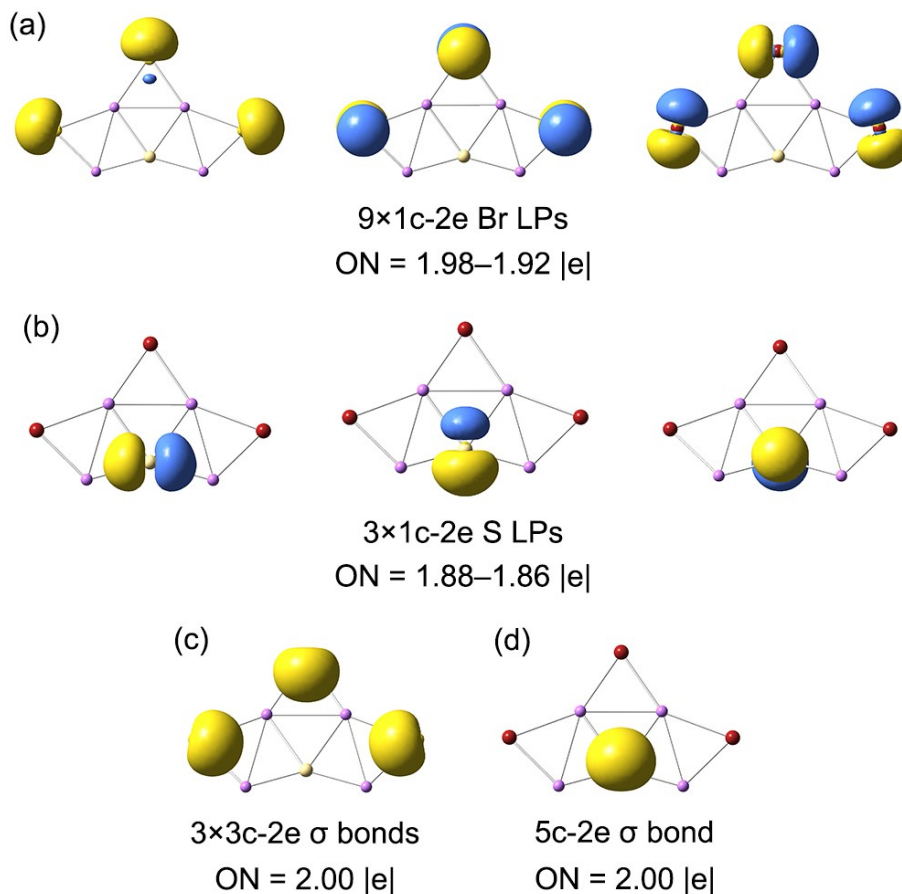

**Figure S2.** The AdNDP bonding pattern of  $\text{SLi}_4\text{I}_3^-$  (**3**) with occupation numbers (ONs, in  $|e|$ ).

(a) Nine lone pairs (LPs) of three I atoms; (b) Three LPs of the S center; (c) Three 3c-2e Li-I-Li  $\sigma$  bonds; (d) One 5c-2e  $\sigma$  bond.

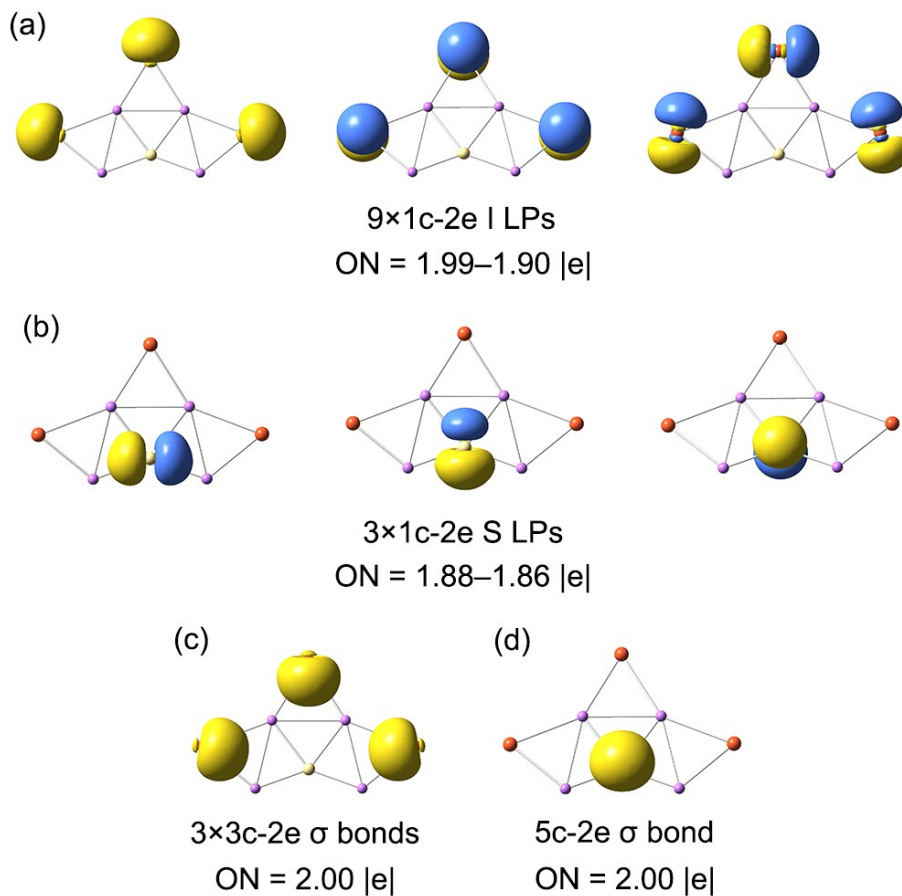

**Figure S3.** 2D plots of ELF and the contour line maps of Laplacian of electron density, bond paths and critical points of ptS **2** and **3**. The blue and red solid lines represent the positive and negative regions, respectively. The brown sticks between the atoms represent bond paths. The brown and yellow dots are bond and ring critical points, respectively.

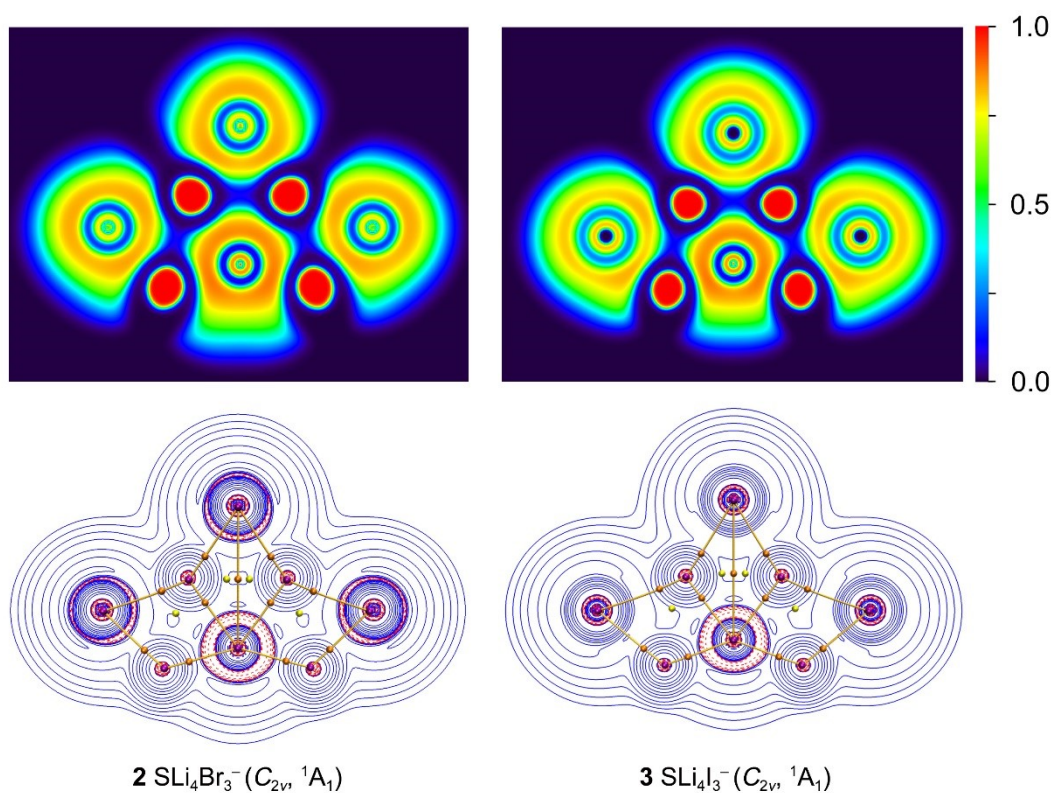

**Figure S4.** Color-filled maps of  $\text{NICS}(0)_{zz}$  and  $\text{NICS}(1)_{zz}$  of the ptS **2**, **3** clusters. 0 and 1 (in Å) represent the height above the molecular plane. Negative values indicate aromaticity.

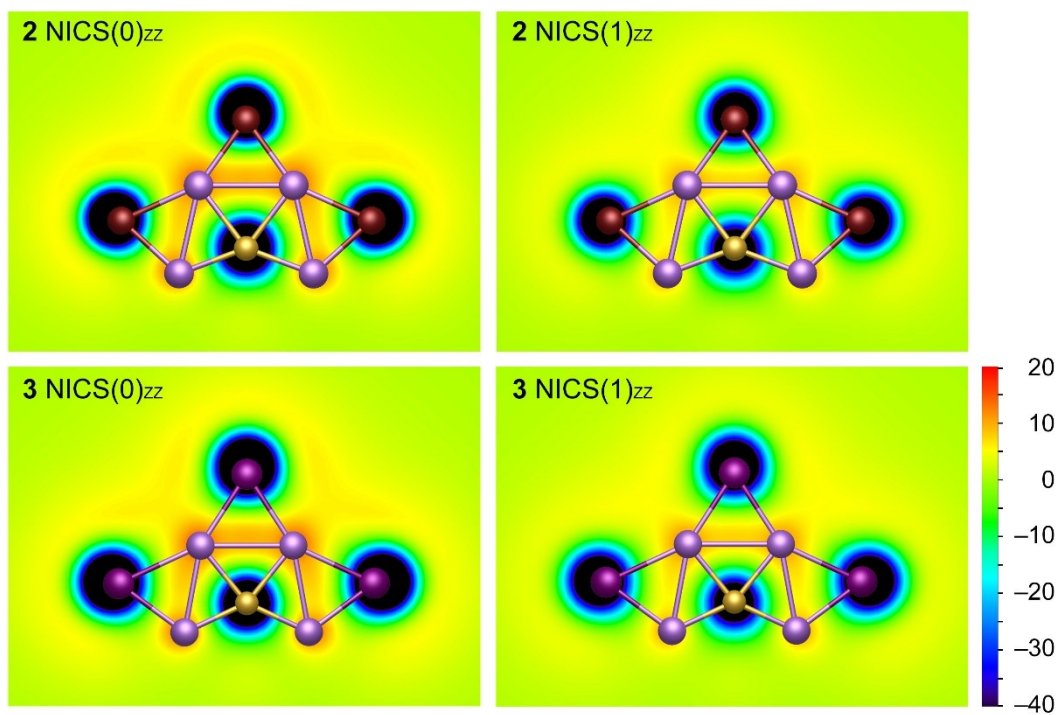

Cartesian coordinates of the top five low-lying isomers of  $\text{SLi}_4\text{X}_3^-$  ( $\text{X} = \text{Cl}, \text{Br}, \text{I}$ ) at the PBE0-D3(BJ)/def2-TZVPP level.

**1**  $\text{SLi}_4\text{Cl}_3^-$  ( $C_{2v}, {}^1A_1$ )

|    |             |             |            |
|----|-------------|-------------|------------|
| S  | 0.00000000  | -1.44266400 | 0.00000000 |
| Li | 1.34681900  | 0.54954200  | 0.00000000 |
| Li | 2.12788400  | -1.89155500 | 0.00000000 |
| Li | -2.12788400 | -1.89155500 | 0.00000000 |
| Li | -1.34681900 | 0.54954200  | 0.00000000 |
| Cl | -3.56355100 | -0.26086800 | 0.00000000 |
| Cl | 3.56355100  | -0.26086800 | 0.00000000 |
| Cl | 0.00000000  | 2.35318900  | 0.00000000 |

**1B** ( $C_{3v}, {}^1A_1$ )

|    |             |             |             |
|----|-------------|-------------|-------------|
| S  | 0.00000000  | 0.00000000  | 2.54462500  |
| Li | 0.00000000  | 1.74531200  | 1.18080700  |
| Li | 0.00000000  | 0.00000000  | -1.25689800 |
| Li | 1.51148500  | -0.87265600 | 1.18080700  |
| Li | -1.51148500 | -0.87265600 | 1.18080700  |
| Cl | 0.00000000  | 2.29131400  | -0.93275600 |
| Cl | 1.98433600  | -1.14565700 | -0.93275600 |
| Cl | -1.98433600 | -1.14565700 | -0.93275600 |

**1C** ( $C_{3v}, {}^1A_1$ )

|    |             |             |             |
|----|-------------|-------------|-------------|
| S  | 0.00000000  | 0.00000000  | 2.38524500  |
| Li | 0.00000000  | 0.00000000  | -1.59571700 |
| Li | 0.00000000  | 1.53861000  | 0.76300900  |
| Li | -1.33247600 | -0.76930500 | 0.76300900  |
| Li | 1.33247600  | -0.76930500 | 0.76300900  |
| Cl | 1.82624600  | 1.05438400  | -0.78909500 |
| Cl | 0.00000000  | -2.10876700 | -0.78909500 |
| Cl | -1.82624600 | 1.05438400  | -0.78909500 |

**1D** ( $C_s, {}^1A'$ )

|    |             |             |             |
|----|-------------|-------------|-------------|
| S  | 0.58023300  | 0.64545200  | 0.00000000  |
| Li | 0.66204800  | -0.22263200 | 2.01966400  |
| Li | 0.53399300  | -1.80103000 | 0.00000000  |
| Li | -0.80567600 | 2.42944000  | 0.00000000  |
| Li | 0.66204800  | -0.22263200 | -2.01966400 |
| Cl | -2.05591800 | 4.14587900  | 0.00000000  |

|    |            |             |             |
|----|------------|-------------|-------------|
| Cl | 0.66204800 | -2.39284200 | 2.22429900  |
| Cl | 0.66204800 | -2.39284200 | -2.22429900 |

**1E** ( $C_s, ^1A'$ )

|    |             |             |             |
|----|-------------|-------------|-------------|
| S  | -1.53588700 | -0.25706500 | 0.00000000  |
| Li | 0.18709800  | -1.35475700 | 1.13123900  |
| Li | 0.18709800  | 1.34391600  | 0.00000000  |
| Li | -2.26890200 | 1.79541600  | 0.00000000  |
| Li | 0.18709800  | -1.35475700 | -1.13123900 |
| Cl | -0.84100800 | 3.45607300  | 0.00000000  |
| Cl | 0.59927400  | -3.28875400 | 0.00000000  |
| Cl | 1.98861800  | -0.00122600 | 0.00000000  |

**2** ( $C_{2v}, ^1A_1$ )

|    |             |             |            |
|----|-------------|-------------|------------|
| S  | 0.00000000  | -1.65112600 | 0.00000000 |
| Li | 2.09680500  | -2.23242000 | 0.00000000 |
| Li | 1.37408300  | 0.28846900  | 0.00000000 |
| Li | -2.09680500 | -2.23242000 | 0.00000000 |
| Li | -1.37408300 | 0.28846900  | 0.00000000 |
| Br | -3.76130600 | -0.59703800 | 0.00000000 |
| Br | 0.00000000  | 2.28212400  | 0.00000000 |
| Br | 3.76130600  | -0.59703800 | 0.00000000 |

**2B** ( $C_{3v}, ^1A_1$ )

|    |             |             |             |
|----|-------------|-------------|-------------|
| S  | 0.00000000  | 0.00000000  | 2.98551600  |
| Li | 1.53517400  | -0.88633300 | 1.67140000  |
| Li | 0.00000000  | 0.00000000  | -0.85995100 |
| Li | -1.53517400 | -0.88633300 | 1.67140000  |
| Li | 0.00000000  | 1.77266600  | 1.67140000  |
| Br | 0.00000000  | 2.46480100  | -0.57362900 |
| Br | 2.13458000  | -1.23240000 | -0.57362900 |
| Br | -2.13458000 | -1.23240000 | -0.57362900 |

**2C** ( $C_s, ^1A'$ )

|    |             |             |             |
|----|-------------|-------------|-------------|
| S  | -0.41072200 | -0.00016100 | 0.92103300  |
| Li | 0.38762100  | -2.04475900 | 0.78538700  |
| Li | 1.77212500  | 0.00004100  | -0.10935100 |
| Li | -2.57395500 | -0.00018500 | 0.29582100  |
| Li | 0.38725900  | 2.04458700  | 0.78542000  |
| Br | 2.49813600  | -2.37554300 | -0.17422300 |
| Br | 2.49772300  | 2.37574200  | -0.17418500 |

|    |             |             |             |
|----|-------------|-------------|-------------|
| Br | -4.80579000 | -0.00009900 | -0.22326000 |
|----|-------------|-------------|-------------|

### 2D ( $C_{3v}, ^1A_1$ )

|    |             |             |             |
|----|-------------|-------------|-------------|
| S  | 0.00000000  | 0.00000000  | 2.75084100  |
| Li | 1.36606500  | 0.78869800  | 1.18018400  |
| Li | -1.36606500 | 0.78869800  | 1.18018400  |
| Li | 0.00000000  | 0.00000000  | -1.28375300 |
| Li | 0.00000000  | -1.57739600 | 1.18018400  |
| Br | 0.00000000  | 2.28813800  | -0.48365600 |
| Br | 1.98158500  | -1.14406900 | -0.48365600 |
| Br | -1.98158500 | -1.14406900 | -0.48365600 |

### 2E ( $C_s, ^1A'$ )

|    |             |             |             |
|----|-------------|-------------|-------------|
| S  | -1.74019200 | -0.28313400 | 0.00000000  |
| Li | -0.07663200 | -1.39630500 | 1.16686700  |
| Li | -0.07663200 | 1.35687700  | 0.00000000  |
| Li | -2.61710800 | 1.70833400  | 0.00000000  |
| Li | -0.07663200 | -1.39630500 | -1.16686700 |
| Br | -1.23473600 | 3.61212000  | 0.00000000  |
| Br | 0.34943100  | -3.51459800 | 0.00000000  |
| Br | 1.92485000  | 0.00854500  | 0.00000000  |

### 3 ( $C_{2v}, ^1A_1$ )

|    |             |             |            |
|----|-------------|-------------|------------|
| S  | 0.00000000  | -1.69937900 | 0.00000000 |
| Li | 2.04564500  | -2.44396100 | 0.00000000 |
| Li | 1.40971200  | 0.17685500  | 0.00000000 |
| Li | -2.04564500 | -2.44396100 | 0.00000000 |
| Li | -1.40971200 | 0.17685500  | 0.00000000 |
| I  | -4.02346800 | -0.82790600 | 0.00000000 |
| I  | 0.00000000  | 2.42548600  | 0.00000000 |
| I  | 4.02346800  | -0.82790600 | 0.00000000 |

### 3B ( $C_s, ^1A'$ )

|    |             |             |             |
|----|-------------|-------------|-------------|
| S  | 0.70831200  | 0.85279000  | 0.00000000  |
| Li | 1.10230400  | 0.17607300  | 2.05434500  |
| Li | 0.67333600  | -1.52517100 | 0.00000000  |
| Li | -0.89279600 | 2.42625300  | 0.00000000  |
| Li | 1.10230400  | 0.17607300  | -2.05434500 |
| I  | -2.53080500 | 4.34348900  | 0.00000000  |
| I  | 1.10230400  | -2.33593600 | 2.57134500  |
| I  | 1.10230400  | -2.33593600 | -2.57134500 |

**3C** ( $C_{3v}, ^1A_1$ )

|    |             |             |             |
|----|-------------|-------------|-------------|
| S  | 0.00000000  | 0.00000000  | 3.23653500  |
| Li | 1.56877200  | -0.90573100 | 1.99082100  |
| Li | 0.00000000  | 0.00000000  | -0.64760100 |
| Li | -1.56877200 | -0.90573100 | 1.99082100  |
| Li | 0.00000000  | 1.81146200  | 1.99082100  |
| I  | 0.00000000  | 2.69986700  | -0.42615800 |
| I  | 2.33815400  | -1.34993400 | -0.42615800 |
| I  | -2.33815400 | -1.34993400 | -0.42615800 |

**3D** ( $C_s, ^1A'$ )

|    |             |             |             |
|----|-------------|-------------|-------------|
| S  | 2.08745900  | 1.20396600  | 0.00000000  |
| Li | 1.65559300  | -1.08565000 | 0.00000000  |
| Li | 0.33647100  | 0.80835600  | 1.45366700  |
| Li | 0.33647100  | 0.80835600  | -1.45366700 |
| Li | 1.05683500  | 3.10328400  | 0.00000000  |
| I  | 0.33647100  | -1.64602900 | -2.33910000 |
| I  | -1.49474300 | 2.72287900  | 0.00000000  |
| I  | 0.33647100  | -1.64602900 | 2.33910000  |

**3E** ( $C_s, ^1A'$ )

|    |             |             |             |
|----|-------------|-------------|-------------|
| S  | -1.82133500 | 0.03181300  | 0.00000000  |
| Li | -0.45806500 | -1.36600600 | 1.21150200  |
| Li | 0.04595700  | 1.40455000  | 0.00000000  |
| Li | -2.51255700 | 2.09220900  | 0.00000000  |
| Li | -0.45806500 | -1.36600600 | -1.21150200 |
| I  | -0.83823200 | 4.04857200  | 0.00000000  |
| I  | -0.45806500 | -3.77397800 | 0.00000000  |
| I  | 2.03760900  | -0.32748500 | 0.00000000  |
